# 1 **Spatial heterogeneity of an ecologically relevant environment** 2 **accelerates diversification and adaptation**

3

4 Stineke van Houte<sup>1\*</sup>, Dan Padfield<sup>1\*</sup>, Pedro Gomez<sup>1</sup>, Adela M. Lujan<sup>1</sup>, Michael A.  
5 Brockhurst<sup>2</sup>, Steve Paterson<sup>3</sup>, Angus Buckling<sup>1</sup>

6

7 <sup>1</sup> ESI and CEC, Biosciences, University of Exeter, Cornwall Campus, Penryn TR10  
8 9EZ, UK.

9 <sup>2</sup> Department of Animal and Plant Sciences, University of Sheffield, Western Bank  
10 Sheffield, S10 2TN, UK.

11 <sup>3</sup> Institute of Integrative Biology, University of Liverpool, Liverpool, UK.

12 \* These authors have contributed equally

13 Correspondence: [vanhoute.stineke@gmail.com](mailto:vanhoute.stineke@gmail.com) or [d.padfield@exeter.ac.uk](mailto:d.padfield@exeter.ac.uk)

14

15 **Running title:** Structured environments promote diversification.

16

## 17 **Abstract**

18 Spatial heterogeneity is a key driver for the evolution of resource specialists and has  
19 been shown to both promote and constrain the rate of adaptation. However, direct  
20 empirical support for these evolutionary consequences of spatial heterogeneity  
21 comes from simplified laboratory environments. Here we address how spatial  
22 structure, through its effect on resource heterogeneity, alters diversification and  
23 adaptive evolution of the soil bacterium *Pseudomonas fluorescens* in an ecologically  
24 relevant context: soil-based compost. Our data show that environmental  
25 heterogeneity can both promote phenotypic diversification and accelerate adaptation.  
26 These results suggest that environmental disturbance, which can decrease spatial  
27 heterogeneity, may limit diversification and adaptation of microbial populations.

28

29 **Keywords:** *Pseudomonas fluorescens*, diversification, environmental heterogeneity,  
30 adaptive radiation, spatial structure, soil.

31

32 **Competing interests:** The authors declare no competing interests.

33

## 34 **Introduction**

35 While there is strong theoretical and empirical evidence that spatial variation in  
36 resources can promote the evolution and maintenance of diverse resource  
37 specialists<sup>1-9</sup>, the impact of spatial heterogeneity on adaptive evolution is more  
38 ambiguous. Theoretically, the structured populations associated with spatial  
39 heterogeneity can constrain adaptive evolution by both slowing the spread of  
40 beneficial mutations<sup>10</sup> and increasing the role of genetic drift by reducing effective  
41 population sizes<sup>11,12</sup>. However, population structure may promote adaptive evolution  
42 by allowing greater exploration of adaptive landscapes<sup>13,14</sup> and spatial heterogeneity  
43 can also increase the chance that beneficial mutations will encounter an environment  
44 that maximises their fitness effect<sup>15,16</sup>. *In vitro* experimental studies involving bacteria  
45 or viruses evolving in nutrient media provide support for both views<sup>3,12,17,18</sup>. This  
46 variation in empirical results demonstrates the nuanced effect of *in vitro* experimental  
47 conditions, making it crucial to know how spatial heterogeneity impacts adaptive  
48 evolution (and indeed diversification) under ecologically relevant conditions. Here, we  
49 conduct such an experiment in potting compost<sup>19</sup>. We evolved the soil bacterium  
50 *Pseudomonas fluorescens* in compost with its spatial structure intact (representing a  
51 heterogeneous environment), or in compost that was mixed with water (representing  
52 a homogeneous environment), and measured fitness, phenotypic diversity based on  
53 substrate use and population genomic changes.

54

## 55 **Materials and methods**

### 56 *Strains*

57 *Pseudomonas fluorescens* strain SBW25<sup>20</sup> was used throughout the study. To  
58 generate a genetically marked SBW25 strain expressing  $\beta$ -galactosidase (LacZ),  
59 Tn7-mediated transposition was carried out to insert a *lacZ* gene into the *P.*  
60 *fluorescens attTn7* genomic location<sup>21</sup>.

61

62 *Growth conditions of the evolution experiment in compost*

63 *Pseudomonas fluorescens* SBW25 was grown overnight at 28°C in King's media B  
64 (KB) in an orbital shaker (180 rpm) and then centrifuged for 10 min at 3500 rpm to  
65 produce a bacterial pellet, which was resuspended in M9 salts buffer to a final  
66 concentration of 10<sup>8</sup> colony forming units (CFUs)/ml. Following our previous  
67 method<sup>22</sup>, six round petri dishes each containing 25 g of twice-autoclaved compost  
68 (John Innes no. 2) were inoculated with 5 ml of the *P. fluorescens* suspension (10<sup>8</sup>  
69 CFUs/ml) to give rise to the heterogeneous environment treatment. These compost  
70 microcosms were then placed in an environmental chamber at 26°C and 80%  
71 relative humidity. For the homogeneous environment treatment, we used six 30-ml  
72 glass vials containing 3 g of compost mixed with 9 ml sterile water (compost-wash  
73 microcosm), and inoculated each vial with 5 ml of the *P. fluorescens* suspension (10<sup>8</sup>  
74 CFUs/ml). Compost-wash populations were propagated at 28°C in an orbital shaker  
75 at 180 rpm. One third of each culture was serially transferred to fresh remaining two  
76 thirds of compost and compost–wash approximately every six days during 48 days.

77

78 *Sample collection*

79 At 48 days after the start of the experiment, compost samples (2 g) were collected  
80 using a sterile spatula and mixed with 10 ml sterile M9 salts buffer and glass beads,  
81 and then vortexed for 1 minute. The resultant sample washes from both treatments  
82 were diluted in M9 salts buffer, plated onto KB agar and incubated for 2 days at 28°C  
83 to determine CFUs per gram of compost. Differences in densities between  
84 treatments were tested using a linear model of log<sub>10</sub> CFUs g<sup>-1</sup> compost as the  
85 response and adaptation environment (homogeneous vs. heterogeneous) as the  
86 predictor. From each replicate experiment a subpopulation of 10 bacterial clones  
87 were isolated and stored at -80°C in 20% glycerol for further analysis.

88

89 *Phenotypic assays*

90 To measure phenotypic diversity (and partition this into different sources of variation)  
91 under either homogeneous or heterogeneous conditions, we performed catabolic  
92 profiling using Biolog GN2 microplates (Biolog, Hayward CA). To this end, we used  
93 the 10 individual colonies isolated from each of the six replicate experiments of each  
94 treatment. Each of the bacterial clones was grown individually overnight in KB broth  
95 (28°C at 180 rpm). Bacteria were then diluted 1000-fold in M9 salts buffer and  
96 incubated for 2h at 28°C to starve the cells. For every clone, each well of a  
97 microplate was filled up with 150  $\mu$ L of culture suspension containing the starved  
98 bacteria and incubated at 28°C for 24h, after which optical density was measured at  
99 660 nm as a proxy for bacterial growth using a plate reader (Bio-Tek Ltd). After  
100 filtering the number of substrates where no growth was observed ( $OD_{660} < 0.1$ ), the  
101 catabolic profiles of each clone on 91 different substrates were used in downstream  
102 analyses.

103 The analysis of resource use splits the phenotypic variation,  $V_P$ , within a  
104 population into genetic variation,  $V_G$ , environmental variation,  $V_E$ , and genotype-by-  
105 environment variation,  $V_{GE}$ . Differences in  $V_P$ ,  $V_G$  and  $V_{GE}$  between evolution  
106 environments would indicate that changes in spatial heterogeneity result in  
107 differences in resource-use diversity.  $V_P$  was calculated as the average (by taking the  
108 mean) Euclidean distance across all pairs of clones<sup>23</sup>,  $V_G$  as the average variance of  
109 clone performance on each substrate<sup>24</sup>, and  $V_E$  as the average variance of individual  
110 clone performance across all substrates. The decomposition of genotype-by-  
111 environment variation into responsiveness and inconsistency gives relative measures  
112 of the diversity of resource exploitation strategies and niche differentiation (functional  
113 diversity)<sup>24,25</sup>. Responsiveness,  $R$ , indicates differences in environmental variances of  
114 genotypes within a community. A high responsiveness value would mean genotypes  
115 utilise the same substrates, but they differ in their environmental variance, such that  
116 some genotypes perform similarly across all substrates, whereas some have

117 asymmetric performance. In this way, responsiveness measures the diversity of  
118 resource exploitation strategies (i.e. specialists vs. generalists):

$$119 \quad R = \sum \frac{(\sigma_i - \sigma_j)^2}{2G(G-1)} \quad (1)$$

120 where  $G$  is the number of genotypes tested within a population and  $\sigma_i$  and  $\sigma_j$  are the  
121 standard deviations of environmental responses of each genotype tested. The  
122 inconsistency component,  $I$ , indicates non-correlations between genotypes over  
123 environments:

$$124 \quad I = \sum \frac{\sigma_i \sigma_j (1 - \rho_{ij})}{G(G-1)} \quad (2)$$

125 where  $\rho_{ij}$  is the correlation of performance across substrates between each pair of  
126 genotypes. High inconsistency suggests that different genotypes within a community  
127 have adapted to utilise different substrates (i.e. different clones perform best on  
128 different substrates). In this way, inconsistency is a measure of niche differentiation  
129 and the evolution of diversity within populations. In instances of high inconsistency  
130 and high responsiveness, genotypes perform best on different substrates, but some  
131 of these perform well across many substrates, whereas others perform well on very  
132 few. For each variance component, differences between heterogeneous and  
133 homogeneous treatments were analysed using linear models, with evolved  
134 environment (homogeneous vs. heterogeneous) as a predictor compared to a model  
135 without any predictor variables.

136

### 137 *Competition assays*

138 Competition assays were performed to evaluate if bacteria evolved in either  
139 heterogeneous or homogeneous conditions are better adapted to their own  
140 environment. For each microcosm, a mix was generated in which the 10 clones used  
141 previously (see above) were pooled together in equal amounts. This mixture was  
142 then competed 50:50 with an ancestral *lacZ*-marked *P. fluorescens* clone to allow us

143 to distinguish the mix of evolved clones from the ancestral clone. Competitions were  
144 performed in either compost microcosms (heterogeneous competition environment)  
145 or in a shaken compost-water mixture (homogeneous competition environment) for 7  
146 days, using a starting inoculum of  $10^8$  CFUs total (i.e.  $5 \times 10^7$  CFUs each of ancestral  
147 clone and evolved clone mix). Samples taken at 0 (T0) and 7 (T7) days were diluted  
148 in M9 salts buffer and plated on KB agar plates containing 50  $\mu\text{g/ml}$  X-gal to allow  
149 blue/white screening. For each microcosm, the numbers of white and blue colonies  
150 were used to calculate the relative fitness of each strain: (relative fitness = [(fraction  
151 strain A at T7) \* (1 - (fraction strain A at T0))] / [(fraction strain A at T0) \* (1 -  
152 (fraction strain A at T7))] )<sup>26</sup>. To look for patterns of local adaptation, we looked at  
153 changes in relative fitness with competition (homogeneous vs. heterogeneous) and  
154 evolution environment (homogeneous vs. heterogeneous) added as potentially  
155 interacting factors. A linear mixed effects model was used, with population included  
156 as random effect to account for the pairing of replicates across treatments. Model  
157 selection was done using likelihood ratio tests, and targeted pairwise comparisons  
158 were carried out using the *R* package '*emmeans*'<sup>27</sup>, where we looked for differences  
159 between evolved heterogeneous populations in homogeneous and heterogeneous  
160 conditions, evolved homogeneous populations in homogeneous and heterogeneous  
161 conditions, and evolved homogeneous populations in homogeneous conditions vs.  
162 evolved heterogeneous populations in heterogeneous conditions.

163

#### 164 *Sequencing*

165 To measure genotypic diversity in clones from each of the treatments, we performed  
166 whole genome sequencing (WGS) on pools of the 10 bacterial clones that were  
167 isolated from each replicate (pool-seq). In parallel, WGS was carried out on (1) a  
168 single clone from each replicate and (2) all 10 individual clones from a single  
169 replicate of each treatment. This allowed us to estimate the degree of linkage  
170 between mutations for estimating diversity. Each of the 10 bacterial clones were

171 grown individually overnight in KB broth (28°C at 180 rpm). Next day, the cultures  
172 were diluted in M9 salts buffer to ensure they had equal densities as measured by  
173 OD<sub>600</sub>. Pools of each of the 10 clones were made by mixing equal volumes of each  
174 bacterial clone. Total DNA extraction (1.2 ml per sample; 12 pooled-clone samples  
175 and 32 single-clone samples) was performed using the Qiagen Blood and Tissue kit  
176 following the manufacturer's instructions. An Illumina HiSeq 2000 sequencer was  
177 used to generate 100 bp paired reads from a 500 bp insert library. Reads were  
178 trimmed for the presence of Illumina adapter sequences using *Cutadapt* (v1.2.1). The  
179 reads were further trimmed using *Sickle* (v1.2) with a minimum window quality score  
180 of 20. Reads shorter than 10 bp after trimming were removed. Trimmed reads were  
181 mapped to the *P. fluorescens* SBW25 reference with *bwa-mem* (v0.7.12-r1039). For  
182 the clonal level sequencing, variants were identified using *GATK Haplotype* (v3.7)  
183 and structural variants were detected using *Delly2* (v0.7.7) with a subsequent cut-off  
184 of  $\geq 0.95$  as a proportion to identify structural variants in haploid genomes. For the  
185 pool-seq, sites prone to sequencing or mapping errors were first identified on the  
186 clonal ancestor strain using *samtools mpileup* with parameters *-Q0* and *-q0* (i.e.  
187 relaxed mapping and base qualities) and then filtered from all subsequent analyses.  
188 SNPs were then detected in the pooled populations using *samtools mpileup* with  
189 parameters *-Q20* and *-q20* (i.e. relatively strict mapping and base qualities). Indels  
190 were identified in pooled data using *scalpel* v0.5.3 (originally designed to detect  
191 indels in tumour versus somatic samples<sup>28</sup>) by comparison of evolved with ancestral  
192 samples.

193

#### 194 *Sequence data analysis*

195 First, we evaluated the ability of our pooled sequencing to correctly identify the  
196 number of genetic changes observed in the clonal sequencing (genetic changes with  
197 a proportion of  $\geq 0.95$ ). To do this we created a pseudo-pool sequencing file that  
198 was based on clonal sequencing where each of the 10 clones from a pool-seq



199 sample had been sequenced individually, such that 10% reads from each file were  
200 added into a separate fasta file. These pseudo-pool data were analysed using the  
201 same pool-seq pipeline to determine the number of mutations, which should  
202 theoretically be equal to the clonal sequencing data (when the cut-off for proportion is  
203  $\geq 0.1$ ). However, whereas 12 genetic changes (8 SNPs and 4 indels) were identified  
204 across all the clonal sequencing, for the 2 replicates for which we had sequenced  
205 every clone, at least 40 SNPs were identified. With a proportion cut-off of 0.1, we  
206 identified SNPs identified in the clonal sequencing, but always identified many more  
207 false negatives. It is unclear whether the clonal sequencing underestimates the  
208 number of genetic changes, or whether the pool-seq pipeline overestimates such  
209 changes. As a result, we took the conservative approach of filtering identified SNPs  
210 and indels in the pool-seq data from all the SNPs and indels identified in the clonal  
211 sequencing.

212

213 We evaluated genetic differences between treatments by calculating (1) the genetic  
214 distance of each population from the reference genome, (2) the number of SNPs /  
215 indels in each population and (3) alpha diversity, calculated using a modified version  
216 of the Hardy-Weinberg equilibrium, such that  $\alpha = \sum(1 - p_i^2 - q_i^2)$ , where  $i$  is the  
217 position of each SNP / indel,  $p$  is the proportion of the SNP / indel and  $q$  is  $1 - p$ .  
218 Differences between these metrics were analysed using 2-sample Kruskal-Wallis  
219 tests as the data did not conform to the assumption of normality. To test for genetic  
220 differences between populations, we performed non-metric multidimensional scaling  
221 on the Euclidean distance matrix of SNPs / indels and their proportions in each  
222 population using the function 'metaMDS' in the R package 'vegan'<sup>29</sup>. Permutational  
223 ANOVA tests were run using the 'adonis' function, with Euclidean distance as the  
224 response term and evolution environment (homogeneous or heterogeneous) as the  
225 predictor variables with 9999 iterations. Changes in beta-diversity were examined

226 using the ‘*betadisper*’ function with the same response and predictor variables in the  
227 PERMANOVA.

228

## 229 **Results**

230 We evolved six replicate populations of the soil bacterium *Pseudomonas fluorescens*  
231 SBW25 in sterile potting compost (spatially heterogeneous) and a sterile compost-  
232 water mix (spatially homogeneous) for 48 days. In this period, populations achieved  
233 approximately 3-fold greater densities in the compost-water mix (Fig. 1; likelihood  
234 ratio test between models with and without evolution environment as a predictor:  
235  $F_{1,10}=14.77$ ,  $P = 0.003$ ).

236

### 237 *Phenotypic data*

238 To test the prediction that spatially heterogeneous environments support the  
239 evolution of greater diversification, we isolated 10 individual clones from each  
240 replicate population and measured their performance across 96 different substrates  
241 (Fig. 2a,b). We then calculated phenotypic variation and partitioned this into  $V_G$ ,  $V_E$   
242 and  $V_{GE}$  (Fig. 2c-f). There was no significant impact of environmental heterogeneity  
243 on phenotypic variation (likelihood ratio test between models with and without  
244 evolution environment as a predictor:  $F_{1,10}=2.34$ ,  $P = 0.16$ ) or genotypic variation  
245 (likelihood ratio test between models with and without evolution environment as a  
246 predictor:  $F_{1,10}=2.38$ ,  $P = 0.15$ ; Fig. 2c), but heterogeneous populations did have  
247 higher environmental variation (likelihood ratio test between models with and without  
248 evolution environment as a predictor:  $F_{1,10}=9.131$ ,  $P = 0.012$ ; Fig. 2d). We further  
249 decomposed genotype-by-environment variation into responsiveness (measures the  
250 diversity of resource exploitation strategies) and inconsistency (a measure of niche  
251 differentiation and the evolution of diversity). Responsiveness was not significantly  
252 impacted by environmental heterogeneity (likelihood ratio test between models with  
253 and without evolution environment as a predictor:  $F_{1,10}=4.808$ ,  $P = 0.053$ ; Fig. 2e).

254 However, consistent with a role for spatial heterogeneity in diversification,  
255 heterogeneous environments had higher inconsistency (likelihood ratio test between  
256 models with and without evolution environment as a predictor:  $F_{1,10}=10.026$ ,  $P =$   
257 0.010; Fig. 2f) compared to the homogeneous environments. This suggests that  
258 heterogeneous environments resulted in higher diversity in resource use than the  
259 homogeneous populations.

260

261 To estimate the extent of adaptation to each environment we competed the evolved  
262 populations against an unevolved *lacZ*-marked strain in both heterogeneous and  
263 homogeneous environments. Evolved populations from both treatments  
264 demonstrated fitness gains relative to the *lacZ* strain (Fig. 3), but there was a  
265 significant interaction between evolution and competition environments (likelihood  
266 ratio test between models with and without interaction:  $\chi^2_1=7.52$ ,  $P = 0.006$ ; Fig. 3).

267 Evolving in a heterogeneous environment increased relative fitness, heterogeneous-  
268 evolved populations competed in heterogeneous environments (relative fitness =  
269 1.90, 95%CI = 1.59-2.22; Table 1) having a significantly higher relative fitness than  
270 homogeneous-evolved populations competed in the homogeneous environment  
271 (selection rate coefficient = 1.36, 95%CI = 1.04-1.67) (post-hoc contrast between  
272 heterogeneous-evolved population in heterogeneous environment vs. homogeneous-  
273 evolved populations in homogeneous environment:  $t$ -ratio = -2.56,  $d.f. = 18.7$ ,  $P_{adj} =$   
274 0.0384). However, this greater adaptation did not transfer into the homogeneous  
275 environments: heterogeneous-evolved populations competed in homogeneous  
276 environments had lower relative fitness (selection rate coefficient = 1.17, 95%CI =  
277 0.85-1.48) than the same populations competed in the heterogeneous environment  
278 (post-hoc contrast between heterogeneous-evolved population in homogeneous vs.  
279 heterogeneous competition environment:  $t$ -ratio = -4.02,  $d.f. = 10$ ,  $P_{adj} = 0.0073$ ). This  
280 difference was not observed in the populations evolved in heterogeneous conditions,  
281 with no difference in fitness between competition environments (Table 1).

282

### 283 *Genomic data*

284 Alongside differences in fitness and phenotypic diversity, we observed some  
285 genomic differences between populations evolved in homogeneous and  
286 heterogeneous environments (Fig. 4). In terms of genetic distance from the ancestor,  
287 heterogeneous populations had a median distance of 0.65 (IQR: 0.53 - 0.7), whereas  
288 homogeneous populations had a median distance of 0.35 (IQR: 0.15 – 0.4), but this  
289 difference was not significant (Wilcoxon test:  $W = 6.5$ ,  $P = 0.074$ ; Fig. 4a). However,  
290 there were more SNPs / indels in the heterogeneous populations (median = 2.5, IQR  
291 = 2-3) compared to those evolved in homogeneous conditions (median = 1, IQR = 1-  
292 1) (Wilcoxon-test:  $W = 4.5$ ,  $P = 0.029$ ; Fig. 4b). Together, this indicates that there  
293 was an increased rate of molecular evolution in the heterogeneous populations.  
294 Within-population diversity was 0.82 (IQR = 0.81 – 0.85) in heterogeneous  
295 populations and 0.45 (IQR = 0.24 – 0.48) in homogeneous populations (Wilcoxon  
296 test:  $W = 5.5$ ,  $P = 0.052$ ; Fig. 4c). Evolution environment (homogeneous vs.  
297 heterogeneous) significantly altered the genetic composition of the populations (i.e.  
298 the Euclidean distance between populations, Fig. 4e, PERMANOVA:  $F_{1,10} = 8.92$ ,  $R^2$   
299 = 0.47,  $P = 0.0017$ ). This difference was driven in large part by two genetic changes:  
300 a SNP in PFLU5698 was observed in all homogeneous populations but never in the  
301 heterogeneous populations, and an indel in PFLU1666 was observed in 4 of the 6  
302 heterogeneous populations but never in the homogeneous populations (Fig. 4d).  
303 There was no difference in beta-diversity (calculated from distance-to-centroids  
304 between groups; Fig. 4e) between homogeneous and heterogeneous populations  
305 (homogeneity of multivariate dispersion ANOVA:  $F_{1,10} = 3.75$ ,  $P = 0.081$ ).

306

### 307 **Discussion**

308 Here, we investigated how spatial heterogeneity in an ecologically relevant  
309 environment promotes both greater diversification and adaptation of a focal

310 bacterium (*P. fluorescens* SBW25) evolving over 48 days. Consistent with the  
311 majority of *in vitro* studies<sup>2-4</sup> and theoretical work<sup>1,5,7,8</sup> we show greater phenotypic  
312 diversification in heterogeneous potting compost compared with a more  
313 homogeneous potting compost-water mix. More importantly, we show that adaptation  
314 in the heterogeneous environment is greater than in the homogenous environment -  
315 a result that can arise theoretically<sup>16</sup> and is supported by some, but not all, empirical  
316 studies<sup>3,12,17,18</sup> - suggesting that natural spatial heterogeneity may indeed promote  
317 rapid adaptation. The latter result is particularly striking given that population sizes  
318 were approximately 3-fold lower in heterogeneous environments, which, if anything,  
319 would lead to a reduced mutation supply and less efficient selection, and hence a  
320 slower pace of adaptation<sup>30</sup>.

321

322 The increased phenotypic diversity in this study is driven, at least partially, by  
323 selection, and not simply drift. This is apparent from the greater fitness of the  
324 heterogeneously evolved populations in the heterogeneous versus homogeneous  
325 environments, which necessarily cannot be explained by drift. Moreover, we have  
326 previously shown that *P. fluorescens* genotypes isolated from populations evolved  
327 under near-identical conditions that differed in their resource use profiles, as  
328 measured using Biolog plates, could reciprocally invade each other from rare<sup>31</sup>. Such  
329 negative frequency dependent fitness is a direct indication that diversity is the result  
330 of selection<sup>7-9</sup>.

331

332 Increased rates of adaptation in spatially heterogeneous environments can  
333 theoretically occur because heterogeneity can increase the spatial covariance  
334 between genotypes and the local conditions they are best adapted to<sup>15,16</sup>. This relies  
335 on the assumption that there are tradeoffs in the ability to use different resources<sup>2</sup>.  
336 We are unable to directly test this hypothesis given the complexity of the soil  
337 environment and the inability to identify specific resources<sup>31</sup>. An alternative

338 explanation is the greater ability to explore adaptive landscapes because of genetic  
339 drift in subdivided populations<sup>13</sup>, but this seems unlikely given the likely role of  
340 selection in driving diversification.

341

342 The population genomic data are consistent with the phenotypic data. There was  
343 evidence for greater rates of molecular evolution, based on the significantly greater  
344 numbers of SNPs and indels, in the heterogeneous populations. There was also an  
345 indication that within-population diversity was greater for heterogeneous versus  
346 homogeneous populations, although the significance of this difference was marginal  
347 ( $P = 0.052$ ). While certain genes were mutated across both treatments, different  
348 genetic changes were also selected for in the different environments. A SNP in  
349 PFLU5698 was observed in all homogeneous populations and resulted in an amino  
350 acid change from alanine to valine. While speculative, the protein is 92% similar to  
351 di-guanylate cyclase, which has been shown to impact biofilm formation in  
352 *Pseudomonas aeruginosa*<sup>32,33</sup>. The other somewhat consistent genetic change was  
353 an insertion in PFLU1666, whose predicted function is likely related to fatty acid  
354 biosynthesis, which occurred in 4 of the 6 heterogeneous populations. This indel  
355 causes a frameshift leading to a truncated protein.

356

357 Here, we have shown that phenotypic (and to an extent, genomic) diversification is  
358 increased by spatial heterogeneity of an ecologically relevant environment,  
359 demonstrating that theoretical predictions and *in vitro* results can be extrapolated to  
360 real-world ecological contexts. Moreover, rates of phenotypic and molecular  
361 evolution were higher in heterogeneous environments, suggesting that preventing  
362 spatial homogenization of environments and populations is key to the emergence  
363 and maintenance of diversity, and can potentially promote evolutionary rescue  
364 allowing adaptation to anthropogenic environmental change<sup>34</sup>.

365

366 **Acknowledgements**

367 This work was funded by NERC. We are grateful to staff at the Centre for Genomic  
368 Research, University of Liverpool for technical assistance.

369

370 **Competing interests**

371 The authors declare no competing interests.

372

373 **References**

- 374 1. Levene H. Genetic equilibrium when more than one ecological niche is  
375 available. *Am Nat.* 1953; 87: 331–333.
- 376 2. Kassen R. The experimental evolution of specialists, generalists, and the  
377 maintenance of diversity. *J Evol Biol.* 2002; 15: 173-190.
- 378 3. Habets MGJL, Rozen DE, Hoekstra RF, de Visser JAGM. The effect of  
379 population structure on the adaptive radiation of microbial populations  
380 evolving in spatially structured environments. *Ecol Lett.* 2006; 9: 1041–1048.
- 381 4. Rainey P, Travisano M. Adaptive radiation in a heterogeneous environment.  
382 *Nature* 1998; 394: 69-72.
- 383 5. Hedrick PW. Genetic polymorphisms in heterogeneous environments: A  
384 decade later. *Ann Rev Ecol Syst.* 1986; 17: 535-566.
- 385 6. Hovick TJ, Elmore RD, Fuhlendorf SD, Engle DM, Hamilton RG. Spatial  
386 heterogeneity increases diversity and stability in grassland bird communities.  
387 *Ecol Appl.* 2015; 25: 662-672.
- 388 7. Chesson P. Mechanisms of maintenance of species diversity. *Ann Rev Ecol*  
389 *Syst.* 2000; 31: 343-366.
- 390 8. Chesson P. Updates on mechanisms of maintenance of species diversity. *J*  
391 *Ecol.* 2018; 106: 1773–1794.
- 392 9. Schluter D. *The ecology of adaptive radiation.* Oxford University Press,  
393 Oxford, 2000.

- 394 10. Gordo I, Campos PRA. Adaptive evolution in a spatially structured asexual  
395 population. *Genetica* 2006; 127: 217-29.
- 396 11. Whitlock MC. Fixation probability and time in a metapopulation. *Genetics*  
397 2003; 164: 767–779.
- 398 12. Perfeito L, Pereira MI, Campos PRA, Gordo I. The effect of spatial structure  
399 on adaptation in *Escherichia coli*. *Biol Lett.* 2008; 4: 57–59.
- 400 13. Wright S. The roles of mutation, inbreeding, crossbreeding, and selection in  
401 evolution. *Proc Sixth Internat Congress Gen.* 1932; 1: 355–66.
- 402 14. Coyne JA, Barton NH, Turelli M. Is Wright's shifting balance process  
403 important in evolution? *Evolution* 2000; 54: 306–317.
- 404 15. Whitlock MC, Gomulkiewicz, R. Probability of fixation in a heterogeneous  
405 environment. *Genetics* 2005; 171: 1407-17.
- 406 16. Campos PRA, Neto PSCA, de Oliveira VM, Gordo I. Environmental  
407 heterogeneity enhances clonal interference. *Evolution* 2008; 62: 1390–1399.
- 408 17. Miralles R, Moya A, Elena SF. Effect of population patchiness and migration  
409 rates on the adaptation and divergence of vesicular stomatitis virus  
410 quasispecies populations *J Gen Virol.* 1999; 80: 2051–2059.
- 411 18. Ally D, Wiss VR, Deckert GE, Green D, Roychoudhury P, Wichman HA, et al.  
412 The impact of spatial structure on viral genomic diversity generated during  
413 adaptation to thermal stress. *PLoS ONE* 2014; 9: e88702.
- 414 19. Gomez P, Buckling A. Bacteria-phage antagonistic coevolution in soil.  
415 *Science* 2011; 332: 106-9.
- 416 20. Rainey PB, Bailey MJ. Physical and genetic map of the *Pseudomonas*  
417 *fluorescens* SBW25 chromosome. *Mol Microbiol.* 1996; 19: 521–533.
- 418 21. Choi KH, Schweizer HP. Mini-Tn7 insertion in bacteria with single attTn7  
419 sites: example *Pseudomonas aeruginosa*. *Nat Protoc.* 2006; 1: 153-61.
- 420 22. Gomez P, Ashby B, Buckling A. Population mixing promotes arms race host-  
421 parasite coevolution. *Proc Biol Sci.* 2015; 282: 20142297.



- 422 23. Hall AR, Colegrave N. How does resource supply affect evolutionary  
423 diversification? *Proc Biol Sci.* 2007; 274: 73–78.
- 424 24. Venail PA, MacLean RC, Bouvier T, Brockhurst MA, Hochberg ME, Mouquet  
425 N. Diversity and productivity peak at intermediate dispersal rate in evolving  
426 metacommunities. *Nature* 2008; 452: 210-214.
- 427 25. Barrett RDH, MacLean RC, Bell G. Experimental evolution of  
428 *Pseudomonas fluorescens* in simple and complex environments. *Am Nat.*  
429 2005; 166: 470–480.
- 430 26. Ross-Gillespie A, Gardner A, West SA, Griffin AS. Frequency dependence  
431 and cooperation: Theory and a test with bacteria. *Am Nat.* 2007; 170: 331-  
432 342.
- 433 27. Lenth R. *emmeans*: Estimated Marginal Means, aka Least-Squares Means. R  
434 package version 1.3.5.1, 2019. [https://CRAN.R-](https://CRAN.R-project.org/package=emmeans)  
435 [project.org/package=emmeans](https://CRAN.R-project.org/package=emmeans).
- 436 28. Narzisi G, O'Rawe JA, Iossifov I, Fang H, Lee YH, Wang Z et al. Accurate de  
437 novo and transmitted indel detection in exome-capture data using  
438 microassembly. *Nat Methods.* 2014 11(10): 1033-6.
- 439 29. Oksanen J, Guillaume Blanchet F, Friendly M, Kindt R, Legendre P, McGlenn  
440 D et al. *Vegan*: Community Ecology Package. R package version 2.5-5, 2019.  
441 <https://CRAN.R-project.org/package=vegan>.
- 442 30. Fisher RA. *The Genetical Theory of Natural Selection*. Clarendon Press,  
443 Oxford, 1930.
- 444 31. Gomez P, Buckling A. Real-time microbial adaptive diversification in soil. *Ecol*  
445 *Lett.* 2013; 16: 650–655.
- 446 32. Almlad H, Rybtke M, Hendiani S, Andersen J, Givskov M, Tolker-Nielsen T.  
447 High levels of cAMP inhibit *Pseudomonas aeruginosa* biofilm formation  
448 through reduction of the c-di-GMP content. *Microbiology* 2019; 165(3): 324-  
449 333.

- 450        33. Lind PA, Farr AD, Rainey PB. Experimental evolution reveals hidden diversity  
451            in evolutionary pathways. *Elife* 2015; 4: e07074.
- 452        34. Bell G. Evolutionary Rescue. *Ann Rev Ecol Evol Syst.* 2017; 48: 605-627.
- 453

454 **Figures and Tables**

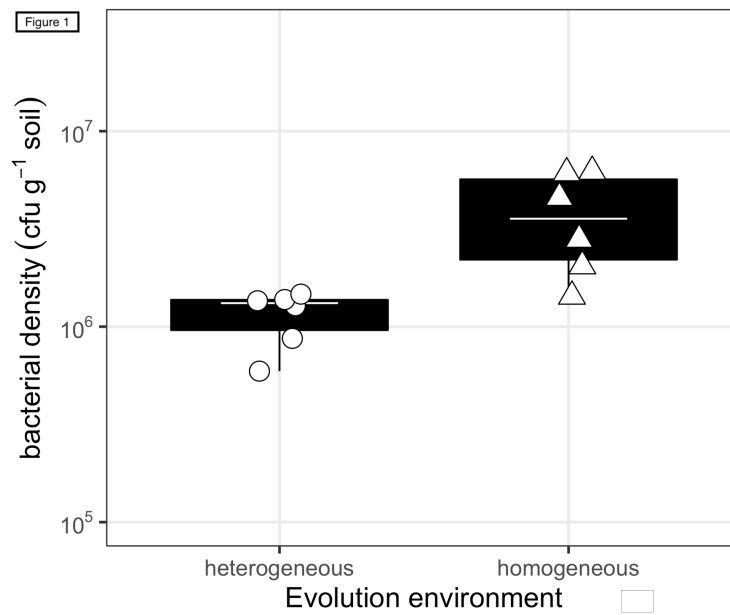

455

456

457 **Figure 1. Bacterial densities of populations evolved under either**  
458 **heterogeneous or homogeneous conditions.** Points represent densities of each  
459 population (CFUs per gram of soil). Tops and bottoms of the bars represent the 75th  
460 and 25th percentiles of the data, the white lines are the medians, and the whiskers  
461 extend from their respective hinge to the smallest or largest value no further than  
462 1.5 \* interquartile range. Points outside this range are outliers.

463

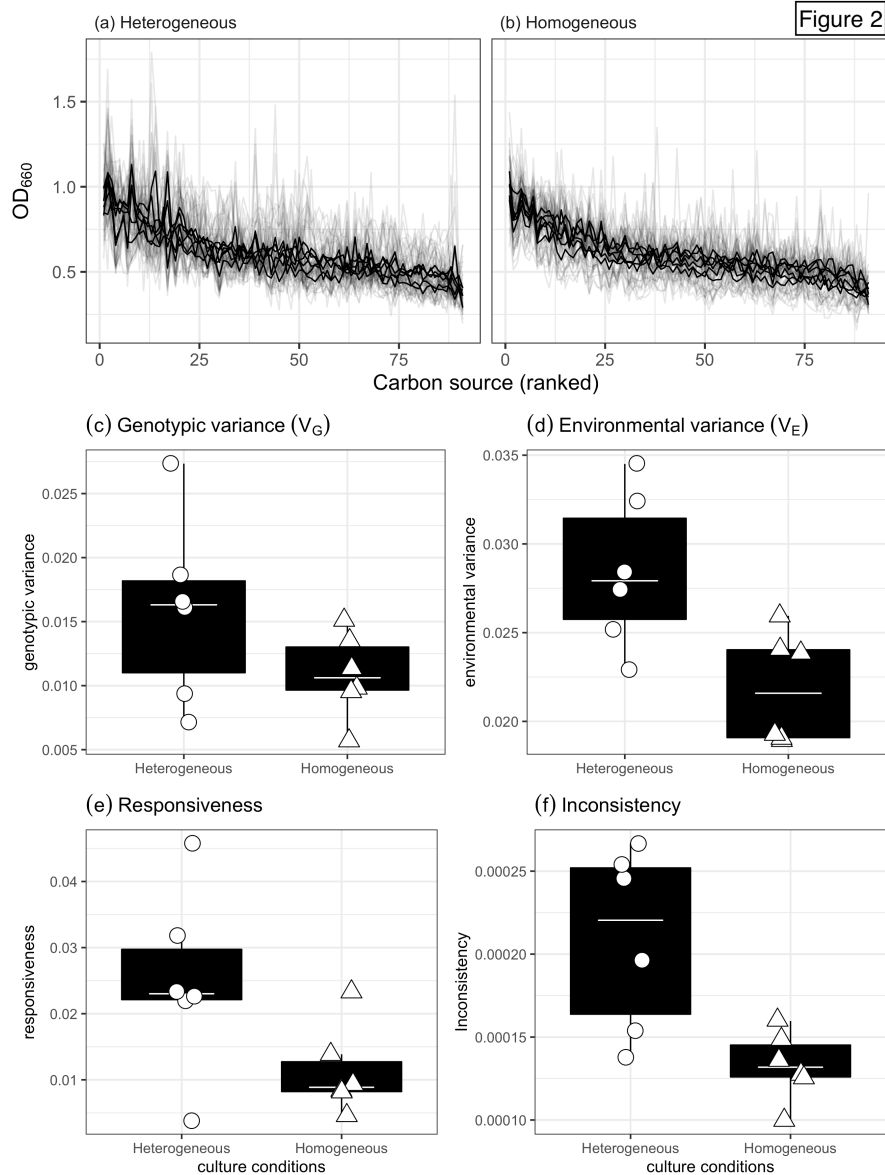

464

465 **Figure 2. Catabolic profiles of populations evolved under either heterogeneous**  
466 **or homogeneous conditions.** Performance of each clone evolved under (a)  
467 heterogeneous or (b) homogeneous conditions on a variety of substrates and  
468 phenotypic variance was partitioned into (c) genotypic variance (d) environmental  
469 variance and genotype x environmental components: (e) responsiveness and (f)  
470 inconsistency. Bacteria evolved in a heterogeneous environment had higher  
471 environmental variance and higher inconsistency, indicating they had evolved to  
472 specialize on different resources. In (a,b), black lines represent the mean OD<sub>660</sub> of  
473 each population and grey lines represent the performance of individual clones. In (c-  
474 f) tops and bottoms of the bars represent the 75th and 25th percentiles of the data,  
475 the white lines are the medians, and the whiskers extend from their respective hinge  
476 to the smallest or largest value no further than 1.5 \* interquartile range. Points  
477 outside this range are outliers.

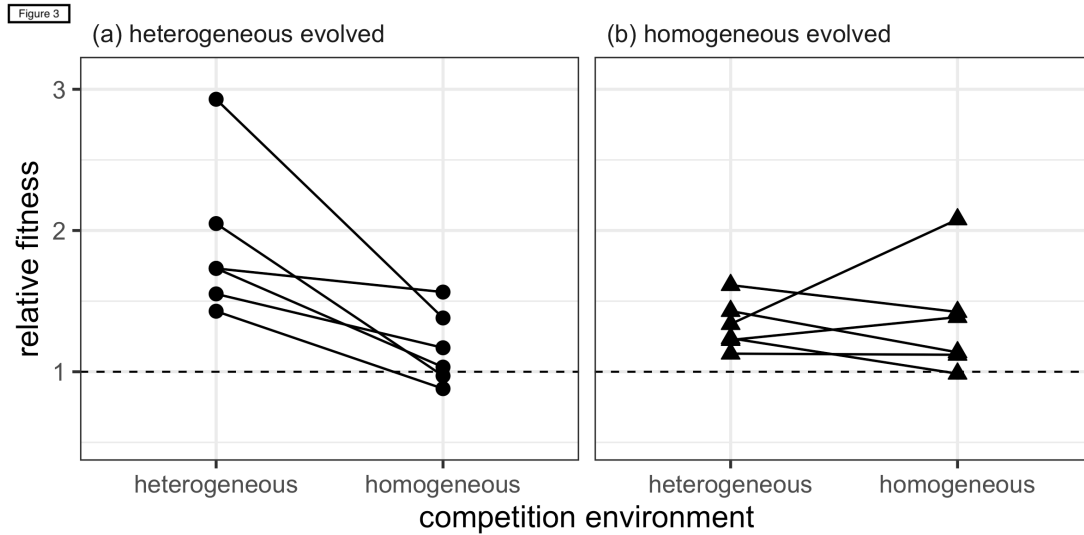

478

479

**Figure 3. Relative fitness of populations evolved under heterogeneous or**  
480 **homogeneous conditions.** Points represent the relative fitness of each population.

481

Lines show the links between each evolved population in each of its competition

482

environments.

483

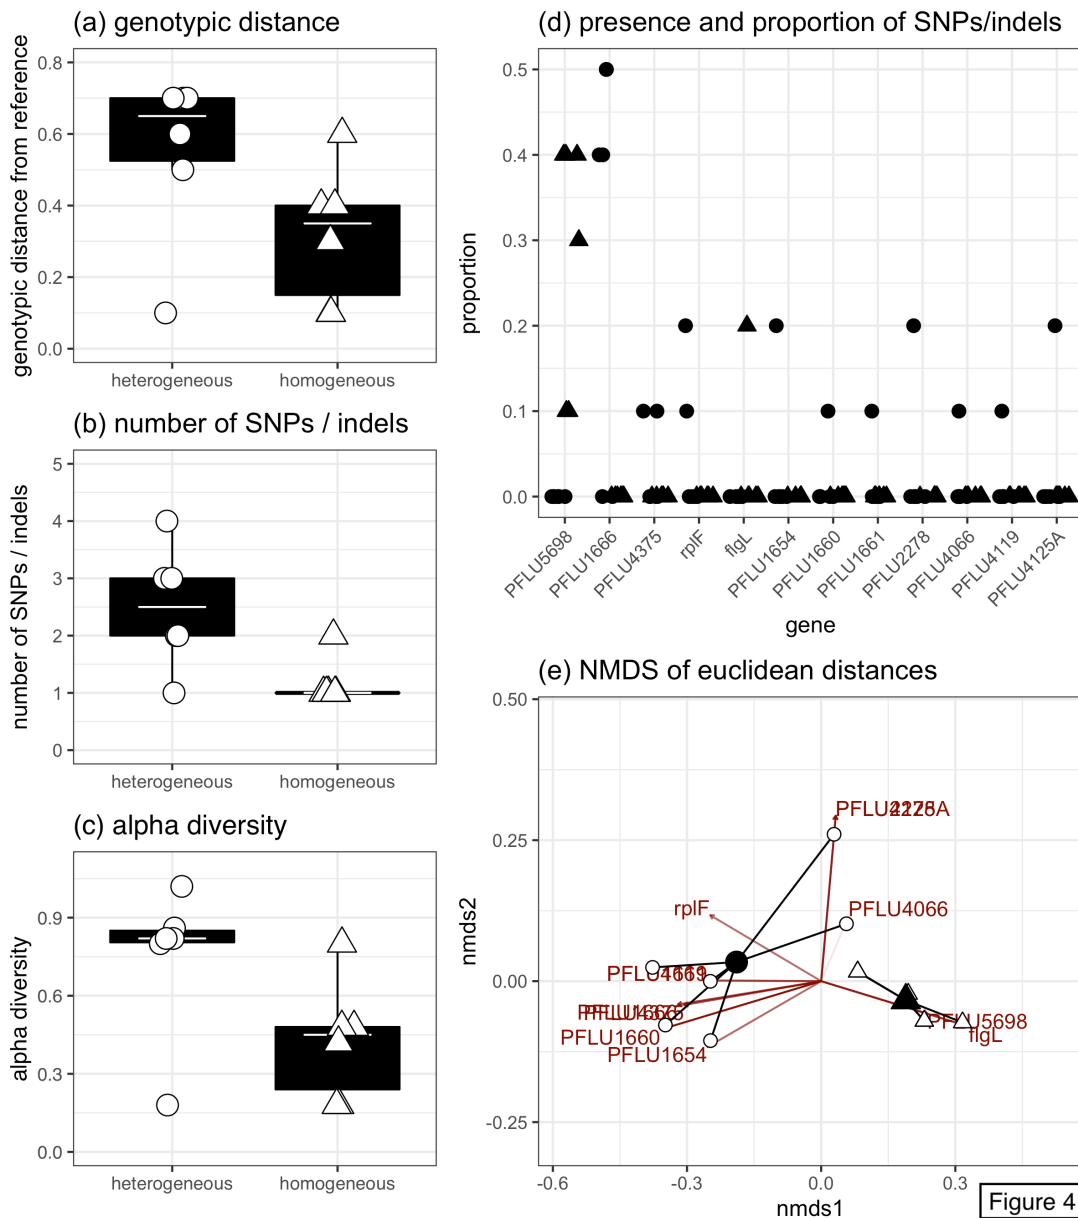

484

485 **Figure 4. Patterns of genetic differences between populations evolved under**  
486 **heterogeneous or homogeneous conditions.** The rate of evolutionary change was  
487 estimated using (a) the genetic distance from the ancestor and (b) the number of  
488 SNPs. (c) Within-population diversity in homogeneous and heterogeneous  
489 populations. (d) Distribution of SNPs and indels across all homogeneous and  
490 heterogeneous populations. (e) Non-metric multidimensional scaling (NMDS) plot of  
491 Euclidean distance between populations, with centroids (black) and populations  
492 (white). In all plots, circles represent heterogeneous populations and triangles are  
493 homogeneous populations. In (a-c) tops and bottoms of the bars represent the 75th  
494 and 25th percentiles of the data, the white lines are the medians, and the whiskers  
495 extend from their respective hinge to the smallest or largest value no further than  
496  $1.5 \times$  interquartile range.

497 **Table 1. Results of pairwise comparisons between relative fitness of different**  
498 **populations that differ in evolution and competition environments (either**  
499 **homogeneous or heterogeneous).** For each treatment, the evolution environment  
500 is followed by the competition environment. *P*-value adjustment: Holm-Bonferroni  
501 method for 3 tests. Degrees-of-freedom method: Kenward-Roger.

| contrast                                                     | estimate    | SE          | d.f.        | t-ratio     | p value       |
|--------------------------------------------------------------|-------------|-------------|-------------|-------------|---------------|
| evolution,competition                                        |             |             |             |             |               |
| <b>homogeneous,homogeneous - homogeneous,heterogeneous</b>   | <b>0.74</b> | <b>0.18</b> | <b>10.0</b> | <b>4.02</b> | <b>0.0073</b> |
| <b>homogeneous,homogeneous - heterogeneous,heterogeneous</b> | <b>0.55</b> | <b>0.21</b> | <b>18.7</b> | <b>2.56</b> | <b>0.0384</b> |
| heterogeneous,homogeneous - heterogeneous,heterogeneous      | -0.03       | 0.18        | 10.0        | -0.15       | 0.8860        |

P value adjustment: Holm-Bonferroni method for 3 tests.

Degrees-of-freedom method: kenward-roger.

502

503
